# Supplementary material
Source: PubMed Central journal article supplement (PMC4028127)
Supplement: NIHMS574908-supplement-supplement_1.pdf [file NIHMS574908-supplement-supplement_1.pdf]

## SUPPLEMENTARY MATERIALS

### Materials and Methods

#### *Immunocytochemistry*

Mouse 3T3-L1 preadipocytes were incubated in DMEM containing 10% FBS and 5  $\mu\text{g/ml}$  insulin in the presence of 10  $\mu\text{M}$  rosiglitazone or 5  $\mu\text{M}$  CDDO for 7 days. Fibroblasts were pretreated with 2.5  $\mu\text{M}$  CDDO for 15 min, followed by incubation in media with 10 ng/ml TGF- $\beta$ 2 for 24 h. At the end of the incubation, cells were fixed in 4% paraformaldehyde, washed in phosphate buffered saline (PBS), incubated with primary antibodies against perilipin (1: 400 dilution, Abcam) or Type I collagen (1:200, Southern Biotechnology) for 120 min, followed by Alexa<sup>®</sup> 594-conjugated secondary antibodies (Invitrogen) for 60 min. Nuclei were identified by 4'-6-diamidino-2-phenylindole (DAPI) staining. Non-immune IgG was used as a negative control in each experiment. Following stringent washing, slides were examined under a Zeiss UV Meta 510 confocal microscope (Carl Zeiss, Jena, Germany). Each experiment was repeated at least three times with consistent results.

#### *RNA Isolation and Quantitative Real-Time Polymerase Chain Reaction*

Total RNA was isolated from cultured cells or mouse skin biopsies using Quick RNA<sup>™</sup> Miniprep (Zymo Research, Irvine, CA), and reverse transcribed for real-time quantitative PCR (qPCR) using SuperScript First-strand synthesis system (Invitrogen, Carlsbad, CA) according to manufacturer's protocol. Real-time qPCR reactions were performed on an ABI-Prism 7300 sequence detection PCR machine (Applied Biosystem, Forster City, CA) [1] using PCR primers

1  
2  
3 shown in Table S1. mRNA expression levels normalized with *Gapdh* or *36B4* levels in each  
4  
5 sample were determined by calculating  $\Delta\Delta C_t$ .  
6  
7

### 8 9 ***Western analysis***

10  
11  
12 At the end of the incubation periods, cultures were harvested, and equal amounts of whole cell  
13  
14 lysates (5–15  $\mu$ g) were subjected to electrophoresis in tris–glycine 4–15% gradient gels [1].  
15  
16 Membranes were incubated with the following primary antibodies: Type I collagen (1: 400,  
17  
18 Southern Biotechnology, Birmingham, AL), phospho-Smad2, E-cadherin, phospho-Akt<sup>S473</sup>, total  
19  
20 Akt (both 1:1000, Cell Signaling Technology, Danvers, MA), Smad1/2/3, histone H4, vimentin  
21  
22 (both 1:200, Santa Cruz Biotechnology, Santa Cruz, CA), and GAPDH (1:3000, Invitrogen),  
23  
24 followed by appropriate secondary antibodies. Antigen–antibody complexes were visualized by  
25  
26 chemiluminescence (Pierce Biotechnology, Rockford, IL). To quantify bands intensity  
27  
28 normalized to loading controls, ImageJ software based analysis was used  
29  
30  
31  
32  
33  
34 (<http://rsb.info.nih.gov/ij/>).  
35  
36

### 37 38 ***Plasmids and transient transfection assays***

39  
40  
41 The PPRE-luc contains 3 tandem copies of the PPAR response element (PPRE) sequence of  
42  
43 the acyl-coenzyme A oxidase gene linked to thymidine kinase and luciferase genes [2].  
44  
45 [SBE]<sub>4</sub>-TK-Luc contains 4 copies of the consensus Smad-binding element linked to thymidine  
46  
47 kinase and luciferase genes [3]. 376Col1A2-luc contains 376 bp of the human Col1A2  
48  
49 promoter and 58 bp of the transcribed sequence linked to the luciferase gene [4]. Fibroblasts at  
50  
51 early confluence were transiently transfected with reporter constructs or appropriate empty  
52  
53 vectors using Lipofectamine<sup>TM</sup> LTX (Invitrogen, Carlsberg, CA). Following incubation with  
54  
55 CDDO and TGF- $\beta$  for 24 h, cultures were harvested and whole cell lysates were assayed for  
56  
57  
58  
59  
60

1  
2  
3 their luciferase activities using the dual-luc reporter assay system (Promega, Madison, WI) [5].  
4  
5 pRL-TK Renilla luciferase (pRL-TK-Luc) was used in each experiment as an internal control  
6  
7  
8 and experiments were performed in triplicate.  
9

### 10 11 ***Cell migration assay***

12  
13  
14 Confluent monolayers of A549 cells were incubated in serum-free medium for 12 h, scratch  
15  
16 wounds were induced using standard p1000 pipette tips, and cell migration was monitored for up  
17  
18 to 48 h by phase contrast microscopy. Gap lengths were determined at indicated intervals at three  
19  
20 different sites/sample.  
21  
22

### 23 24 25 ***Histochemical and immunohistochemical analysis***

26  
27  
28 Consecutive 4- $\mu$ m serial sections of paraffin-embedded skin tissue from mice were stained with  
29  
30 hematoxylin and eosin (H&E) or Trichrome [6]. Dermal thickness, defined as the distance  
31  
32 between the epidermal-dermal and dermal-subcutaneous adipose junctions, was determined at  
33  
34 five random locations/slide for each mouse [7]. The total collagen content in skin samples was  
35  
36 determined by hydroxyproline assays [8]. For quantification of myofibroblasts, skin sections  
37  
38 were immunostained with anti- $\alpha$ SMA antibodies (Sigma-Aldrich) followed by biotinylated  
39  
40 secondary antibodies (all Vector labs, Peterborough, UK). Spindle-shaped cells positive for  
41  
42  $\alpha$ SMA in the dermis were counted in six randomly chosen high-power fields by two observers in  
43  
44 a blinded manner [9].  
45  
46  
47  
48  
49

## 50 51 **Results**

### 52 53 ***CDDO attenuates TGF- $\beta$ -induced epithelial-mesenchymal transition***

54  
55  
56  
57  
58  
59  
60

1  
2  
3 Epithelial-mesenchymal transition (EMT) has been suggested to play an important role in fibrosis, we  
4 therefore examined how CDDO modulated EMT using human A549 epithelial cells. In the presence of  
5 TGF- $\beta$ , these alveolar epithelial cells readily differentiated into a mesenchymal phenotype with  
6 characteristic loss of the epithelial cell marker E-cadherin, and concurrent expression of Type I collagen,  
7 vimentin and connective tissue growth factor (Fig. S1 A and B). Pretreatment of the epithelial cells with  
8 CDDO markedly reduced the stimulation of *COL1A1*, *CTGF* and vimentin, and partially abrogated the  
9 loss of E-cadherin induced by TGF- $\beta$ . Moreover, enhanced migration of epithelial cells induced by TGF-  
10  $\beta$  was also significantly attenuated by CDDO (Fig. S1C).  
11  
12  
13  
14  
15  
16  
17  
18  
19  
20  
21  
22  
23  
24  
25  
26  
27  
28

## 29 REFERENCES

- 30 1. Ghosh AK, Wei J, Wu M, et al. Constitutive Smad signaling and Smad-dependent  
31 collagen gene expression in mouse embryonic fibroblasts lacking peroxisome proliferator-  
32 activated receptor-gamma. *Biochem Biophys Res Commun.* 2008;374(2):231-6.
- 33 2. Park Y, Freedman BD, Lee EJ, et al. A dominant negative PPARgamma mutant shows  
34 altered cofactor recruitment and inhibits adipogenesis in 3T3-L1 cells. *Diabetologia.*  
35 2003;46(3):365-77.
- 36 3. Zawel L, Dai JL, Buckhaults P, et al. Human Smad3 and Smad4 are sequence-specific  
37 transcription activators. *Molecular cell.* 1998;1(4):611-7.
- 38 4. Poncelet AC, de Caestecker MP, Schnaper HW. The transforming growth factor-  
39 beta/SMAD signaling pathway is present and functional in human mesangial cells. *Kidney*  
40 *international.* 1999;56(4):1354-65.
- 41 5. Ghosh AK, Bhattacharyya S, Lakos G, et al. Disruption of transforming growth factor  
42 beta signaling and profibrotic responses in normal skin fibroblasts by peroxisome proliferator-  
43 activated receptor gamma. *Arthritis Rheum.* 2004;50(4):1305-18.
- 44 6. Lakos G, Takagawa S, Chen SJ, et al. Targeted disruption of TGF-beta/Smad3 signaling  
45 modulates skin fibrosis in a mouse model of scleroderma. *Am J Pathol.* 2004;165(1):203-17.
- 46 7. Wu M, Melichian DS, Chang E, et al. Rosiglitazone abrogates bleomycin-induced  
47 scleroderma and blocks profibrotic responses through peroxisome proliferator-activated receptor-  
48 gamma. *Am J Pathol.* 2009;174(2):519-33.
- 49 8. Woessner JF, Jr. The determination of hydroxyproline in tissue and protein samples  
50 containing small proportions of this imino acid. *Archives of biochemistry and biophysics.*  
51 1961;93:440-7.  
52  
53  
54  
55  
56  
57  
58  
59  
60

1  
2  
3 9. Distler JH, Jungel A, Huber LC, et al. Imatinib mesylate reduces production of  
4 extracellular matrix and prevents development of experimental dermal fibrosis. *Arthritis Rheum.*  
5 2007;56(1):311-22.  
6  
7

## 8 9 10 **Figure legends**

11  
12  
13 **FigureS1. *CDDO attenuates epithelial-mesenchymal transition and migration induced by***  
14 ***TGF-β.***  
15  
16

17  
18  
19 A, B. A549 epithelial cells were preincubated with CDDO (2.5 μM) followed by with TGF-β (5  
20 ng/ml) for 72 h. A. RNA was examined by real-time qPCR. The results, normalized with  
21 GAPDH, represent the means ± SD of triplicate determinations from a representative experiment.  
22  
23 Open bars, DMSO; closed bars, CDDO. \* p<0.05. B. Western analysis of whole cell lysates.  
24  
25 Bands were quantitated by densitometry. Relative levels normalized with GAPDH are shown  
26 below the images. Representative images. C. In vitro wound healing assays. Right panel, scratch  
27 widths were determined at three different sites/sample. The results are means ± SD of triplicates  
28  
29 from an experiment representative of three. \* p < 0.05.  
30  
31  
32  
33  
34  
35  
36  
37  
38  
39  
40  
41  
42  
43  
44  
45  
46  
47  
48  
49  
50  
51  
52  
53  
54  
55  
56  
57  
58  
59  
60

Table S1 Primers used for real-time quantitative PCR

|               |                 |                            |                          |
|---------------|-----------------|----------------------------|--------------------------|
| Human         | GAPDH           | forward                    | CATGAGAAGTATGACAACAGCCT  |
|               |                 | reverse                    | AGTCCTTCCACGATACCAAAGT   |
|               | Col1A1          | forward                    | GCTGGTGTGATGGGATTC       |
|               |                 | reverse                    | GGGAACACCTCGCTCT         |
|               | Col1A2          | forward                    | CGGACGACCTGGTGAGAGA      |
| reverse       |                 | CATTGTGTCCCCTAATGCCTT      |                          |
| $\alpha$ -SMA | forward         | CAGGGCTGTTTTCCCATCCAT      |                          |
|               | reverse         | GCCATGTTCTATCGGGTACTTC     |                          |
| CTGF          | forward         | AGCTGACCTGGAAGAGAACATTAAG  |                          |
|               | reverse         | GATAGGCTTGGAGATTTTGGGAGTA  |                          |
| Mouse         | GAPDH           | forward                    | ATCTTCTTGTGCAGTGCCAGC    |
|               |                 | reverse                    | GTTGATGGCAACAATCTCCAC    |
|               | PPAR $\gamma$ 2 | forward                    | AACTCTGGGAGATTCTCCTGTTGA |
| reverse       |                 | TGGTAATTTCTTGTGAAGTGCTCATA |                          |
| FABP4         | forward         | CACCGCAGACGACAGGAAG        |                          |
|               | reverse         | GCACCTGCACCAGGGC           |                          |

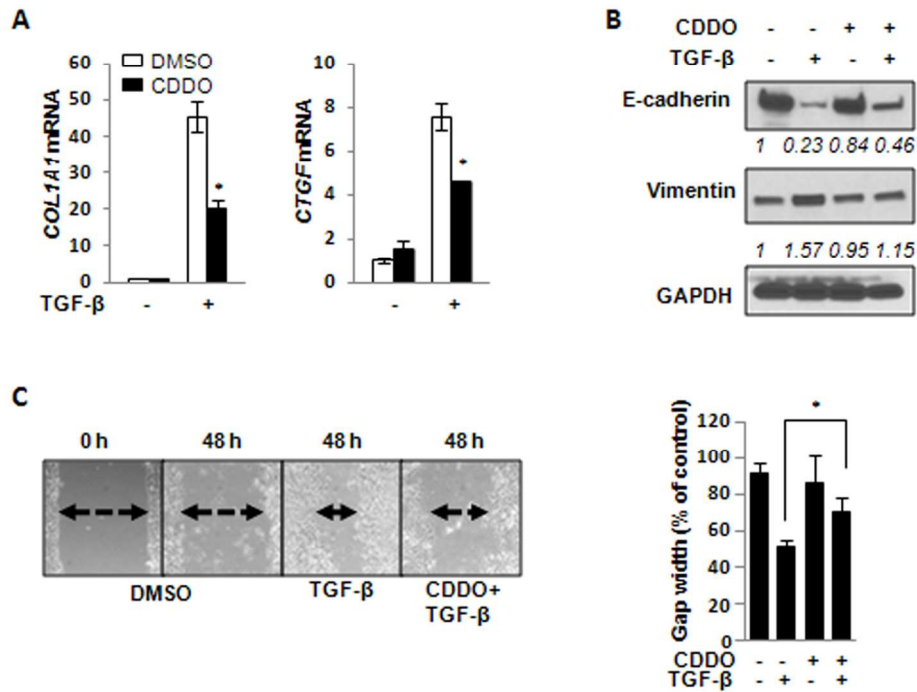

177x137mm (300 x 300 DPI)

Review Only
